# Supplementary material for: Optimization of the Electrospray Process to Produce Lignin Nanoparticles for PLA-Based Food Packaging
Source: MDPI journal article supplement (doi:10.3390/polym15132973), 2023-07-07
Supplement: s1 [file s1]

---

# Supplementary Material: Optimization of the Electrospray Process to Produce Lignin Nanoparticles for PLA-based Food Packaging

Rodrigue Daassi, Calvin Durand, Denis Rodrigue and Tatjana Stevanovic

Table S1. Range and levels of independent process variables used in the experimental design.

| Trial | Bloc | Lignin concentration | Flow rate | Applied voltage | Tip-to-collector distance |
|-------|------|----------------------|-----------|-----------------|---------------------------|
| 1     | 1    | 0                    | 0         | 0               | 0                         |
| 2     | 1    | -1                   | 1         | 0               | 0                         |
| 3     | 1    | -1                   | 0         | 0               | 1                         |
| 4     | 1    | 0                    | -1        | 0               | 1                         |
| 5     | 1    | 0                    | 1         | 0               | 1                         |
| 6     | 1    | 0                    | 0         | 1               | -1                        |
| 7     | 1    | 1                    | 0         | 0               | -1                        |
| 8     | 1    | 0                    | -1        | 0               | -1                        |
| 9     | 1    | -1                   | 0         | -1              | 0                         |
| 10    | 1    | 1                    | 0         | 1               | 0                         |
| 11    | 1    | 0                    | -1        | -1              | 0                         |
| 12    | 1    | 1                    | 1         | 0               | 0                         |
| 13    | 1    | 1                    | 0         | -1              | 0                         |
| 14    | 1    | 1                    | -1        | 0               | 0                         |
| 15    | 1    | 0                    | 0         | 0               | 0                         |
| 16    | 1    | 0                    | -1        | 1               | 0                         |
| 17    | 1    | -1                   | 0         | 1               | 0                         |
| 18    | 1    | 0                    | 1         | 0               | -1                        |
| 19    | 1    | 0                    | 1         | -1              | 0                         |
| 20    | 1    | 0                    | 0         | -1              | 1                         |
| 21    | 1    | 1                    | 0         | 0               | 1                         |
| 22    | 1    | 0                    | 0         | -1              | -1                        |
| 23    | 1    | -1                   | 0         | 0               | -1                        |
| 24    | 1    | -1                   | -1        | 0               | 0                         |
| 25    | 1    | 0                    | 0         | 0               | 0                         |
| 26    | 1    | 0                    | 0         | 1               | 1                         |
| 27    | 1    | 0                    | 1         | 1               | 0                         |
| 28    | 2    | 0                    | 0         | 0               | 0                         |
| 29    | 2    | 0                    | 1         | -1              | 0                         |
| 30    | 2    | -1                   | 0         | 1               | 0                         |
| 31    | 2    | -1                   | 0         | 0               | -1                        |
| 32    | 2    | 0                    | -1        | -1              | 0                         |
| 33    | 2    | 0                    | 0         | 0               | 0                         |
| 34    | 2    | 0                    | 1         | 0               | -1                        |
| 35    | 2    | 0                    | 0         | -1              | -1                        |
| 36    | 2    | -1                   | -1        | 0               | 0                         |
| 37    | 2    | 0                    | 0         | -1              | 1                         |
| 38    | 2    | 1                    | 0         | 0               | 1                         |
| 39    | 2    | 0                    | 1         | 0               | 1                         |
| 40    | 2    | 0                    | 0         | 1               | 1                         |
| 41    | 2    | 1                    | 0         | -1              | 0                         |
| 42    | 2    | 0                    | -1        | 1               | 0                         |
| 43    | 2    | 0                    | 1         | 1               | 0                         |
| 44    | 2    | -1                   | 1         | 0               | 0                         |
| 45    | 2    | 1                    | 1         | 0               | 0                         |

|    |   |    |    |    |    |
|----|---|----|----|----|----|
| 46 | 2 | 0  | -1 | 0  | -1 |
| 47 | 2 | 1  | -1 | 0  | 0  |
| 48 | 2 | 0  | 0  | 0  | 0  |
| 49 | 2 | 1  | 0  | 0  | -1 |
| 50 | 2 | 1  | 0  | 1  | 0  |
| 51 | 2 | 0  | -1 | 0  | 1  |
| 52 | 2 | 0  | 0  | 1  | -1 |
| 53 | 2 | -1 | 0  | 0  | 1  |
| 54 | 2 | -1 | 0  | -1 | 0  |

**Table S2.** Condition design using the response surface methodology with the Box–Behnken design and experimental/predicted data of the response.

| Run | TypeP<br>t | Bloc | LC<br>(mg/mL) | FR<br>(mL/h) | HV<br>(kV) | TCD<br>(cm) | Z-Ave (d. nm) |       | PdI   |       | ZP (mV) |       |
|-----|------------|------|---------------|--------------|------------|-------------|---------------|-------|-------|-------|---------|-------|
|     |            |      |               |              |            |             | EXP           | PRED  | EXP   | PRED  | EXP     | PRED  |
| 1   | 0          | 1    | 27.5          | 0.75         | 20         | 17.5        | 250.0         | 212.3 | 0.278 | 0.363 | -31.1   | -30.9 |
| 2   | 2          | 1    | 5             | 1            | 20         | 17.5        | 478.6         | 548.5 | 0.504 | 0.446 | -33.6   | -32.2 |
| 3   | 2          | 1    | 5             | 0.75         | 20         | 25          | 667.2         | 668.6 | 0.497 | 0.548 | -14.8   | -25.3 |
| 4   | 2          | 1    | 27.5          | 0.5          | 20         | 25          | 462.4         | 381.4 | 0.451 | 0.324 | -21.4   | -27.4 |
| 5   | 2          | 1    | 27.5          | 1            | 20         | 25          | 577.2         | 596.1 | 0.488 | 0.655 | -30.3   | -29.9 |
| 6   | 2          | 1    | 27.5          | 0.75         | 30         | 10          | 455.4         | 567.2 | 0.289 | 0.515 | -26.0   | -30.2 |
| 7   | 2          | 1    | 50            | 0.75         | 20         | 10          | 384.9         | 518.3 | 0.639 | 0.508 | -29.5   | -25.2 |
| 8   | 2          | 1    | 27.5          | 0.5          | 20         | 10          | 352.2         | 256.5 | 0.63  | 0.546 | -28.4   | -30.8 |
| 9   | 2          | 1    | 5             | 0.75         | 10         | 17.5        | 636.4         | 477.4 | 0.383 | 0.426 | -34.6   | -38.1 |
| 10  | 2          | 1    | 50            | 0.75         | 30         | 17.5        | 490.7         | 431.9 | 0.431 | 0.442 | -29.9   | -33.7 |
| 11  | 2          | 1    | 27.5          | 0.5          | 10         | 17.5        | 278.2         | 319.0 | 0.517 | 0.420 | -30.0   | -32.4 |
| 12  | 2          | 1    | 50            | 1            | 20         | 17.5        | 839.8         | 648.3 | 0.751 | 0.559 | -28.9   | -28.3 |
| 13  | 2          | 1    | 50            | 0.75         | 10         | 17.5        | 712.6         | 639.8 | 0.218 | 0.441 | -22.4   | -24.8 |
| 14  | 2          | 1    | 50            | 0.5          | 20         | 17.5        | 218.2         | 271.6 | 0.203 | 0.303 | -28.1   | -28.9 |
| 15  | 0          | 1    | 27.5          | 0.75         | 20         | 17.5        | 173.1         | 212.3 | 0.226 | 0.363 | -33.7   | -30.9 |
| 16  | 2          | 1    | 27.5          | 0.5          | 30         | 17.5        | 334.4         | 330.7 | 0.406 | 0.433 | -31.9   | -26.2 |
| 17  | 2          | 1    | 5             | 0.75         | 30         | 17.5        | 723.4         | 681.7 | 0.693 | 0.532 | -32.0   | -24.9 |
| 18  | 2          | 1    | 27.5          | 1            | 20         | 10          | 487.3         | 507.9 | 0.213 | 0.428 | -29.2   | -30.6 |
| 19  | 2          | 1    | 27.5          | 1            | 10         | 17.5        | 512.7         | 565.6 | 0.651 | 0.485 | -23.5   | -29.6 |
| 20  | 2          | 1    | 27.5          | 0.75         | 10         | 25          | 767.2         | 675.6 | 0.537 | 0.464 | -33.1   | -30.3 |
| 21  | 2          | 1    | 50            | 0.75         | 20         | 25          | 522.6         | 541.5 | 0.498 | 0.392 | -33.7   | -33.0 |
| 22  | 2          | 1    | 27.5          | 0.75         | 10         | 10          | 367.5         | 349.0 | 0.414 | 0.481 | -32.5   | -32.7 |
| 23  | 2          | 1    | 5             | 0.75         | 20         | 10          | 409.4         | 478.7 | 0.401 | 0.428 | -48.4   | -37.3 |
| 24  | 2          | 1    | 5             | 0.5          | 20         | 17.5        | 334.4         | 458.9 | 0.359 | 0.491 | -31.1   | -29.4 |
| 25  | 0          | 1    | 27.5          | 0.75         | 20         | 17.5        | 134.2         | 212.3 | 0.860 | 0.363 | -32.8   | -30.9 |
| 26  | 2          | 1    | 27.5          | 0.75         | 30         | 25          | 438.5         | 453.7 | 0.528 | 0.537 | -29.0   | -28.4 |
| 27  | 2          | 1    | 27.5          | 1            | 30         | 17.5        | 700.3         | 550.3 | 0.591 | 0.580 | -34.9   | -31.4 |
| 28  | 0          | 2    | 27.5          | 0.75         | 20         | 17.5        | 146.7         | 212.3 | 0.182 | 0.363 | -31.7   | -30.9 |
| 29  | 2          | 2    | 27.5          | 1            | 10         | 17.5        | 549.5         | 565.6 | 0.526 | 0.485 | -31.8   | -29.6 |
| 30  | 2          | 2    | 5             | 0.75         | 30         | 17.5        | 857.3         | 681.7 | 0.703 | 0.532 | -9.03   | -24.9 |
| 31  | 2          | 2    | 5             | 0.75         | 20         | 10          | 674.6         | 478.7 | 0.517 | 0.428 | -31.3   | -37.3 |
| 32  | 2          | 2    | 27.5          | 0.5          | 10         | 17.5        | 212.3         | 319.0 | 0.515 | 0.420 | -29.8   | -32.4 |
| 33  | 0          | 2    | 27.5          | 0.75         | 20         | 17.5        | 462.3         | 212.3 | 0.343 | 0.363 | -24.9   | -30.9 |
| 34  | 2          | 2    | 27.5          | 1            | 20         | 10          | 484.1         | 507.9 | 0.375 | 0.428 | -29.4   | -30.6 |
| 35  | 2          | 2    | 27.5          | 0.75         | 10         | 10          | 426.7         | 349.0 | 0.478 | 0.481 | -31.6   | -32.7 |
| 36  | 2          | 2    | 5             | 0.5          | 20         | 17.5        | 305.6         | 458.9 | 0.305 | 0.491 | -30.1   | -29.4 |
| 37  | 2          | 2    | 27.5          | 0.75         | 10         | 25          | 766.7         | 675.6 | 0.496 | 0.464 | -35.4   | -30.3 |
| 38  | 2          | 2    | 50            | 0.75         | 20         | 25          | 383.7         | 541.5 | 0.319 | 0.392 | -29.8   | -33.0 |
| 39  | 2          | 2    | 27.5          | 1            | 20         | 25          | 564.2         | 596.1 | 0.590 | 0.655 | -23.7   | -29.9 |
| 40  | 2          | 2    | 27.5          | 0.75         | 30         | 25          | 295.4         | 453.7 | 0.542 | 0.537 | -31.8   | -28.4 |
| 41  | 2          | 2    | 50            | 0.75         | 10         | 17.5        | 469.9         | 639.8 | 0.295 | 0.441 | -29.6   | -24.8 |
| 42  | 2          | 2    | 27.5          | 0.5          | 30         | 17.5        | 346.2         | 330.7 | 0.346 | 0.433 | -27.0   | -26.2 |
| 43  | 2          | 2    | 27.5          | 1            | 30         | 17.5        | 497.0         | 550.3 | 0.471 | 0.580 | -35.4   | -31.4 |

|    |   |   |      |      |    |      |       |       |       |       |       |       |
|----|---|---|------|------|----|------|-------|-------|-------|-------|-------|-------|
| 44 | 2 | 2 | 5    | 1    | 20 | 17.5 | 473.1 | 548.5 | 0.505 | 0.446 | -34.0 | -32.2 |
| 45 | 2 | 2 | 50   | 1    | 20 | 17.5 | 657.4 | 648.3 | 0.612 | 0.559 | -28.0 | -28.3 |
| 46 | 2 | 2 | 27.5 | 0.5  | 20 | 10   | 331.5 | 256.5 | 0.655 | 0.546 | -32.6 | -30.8 |
| 47 | 2 | 2 | 50   | 0.5  | 20 | 17.5 | 393.1 | 271.6 | 0.213 | 0.303 | -29.3 | -28.9 |
| 48 | 0 | 2 | 27.5 | 0.75 | 20 | 17.5 | 103.6 | 212.3 | 0.277 | 0.363 | -30.8 | -30.9 |
| 49 | 2 | 2 | 50   | 0.75 | 20 | 10   | 555.4 | 518.3 | 0.615 | 0.508 | -24.9 | -25.2 |
| 50 | 2 | 2 | 50   | 0.75 | 30 | 17.5 | 466.6 | 431.9 | 0.494 | 0.442 | -32.6 | -33.7 |
| 51 | 2 | 2 | 27.5 | 0.5  | 20 | 25   | 464.8 | 381.4 | 0.425 | 0.324 | -29.7 | -27.4 |
| 52 | 2 | 2 | 27.5 | 0.75 | 30 | 10   | 418.8 | 567.2 | 0.562 | 0.515 | -29.3 | -30.2 |
| 53 | 2 | 2 | 5    | 0.75 | 20 | 25   | 715.9 | 668.6 | 0.455 | 0.548 | -34.3 | -25.3 |
| 54 | 2 | 2 | 5    | 0.75 | 10 | 17.5 | 344.9 | 477.4 | 0.391 | 0.426 | -40.3 | -38.1 |

LC: lignin concentration, FR: flow rate, HV: applied voltage, EXP: experimental, PRED: predicted, TCD: tip-to-collector distance, d: Sizes of nanoparticles, PdI: polydispersity index, ZP: Zeta potential.

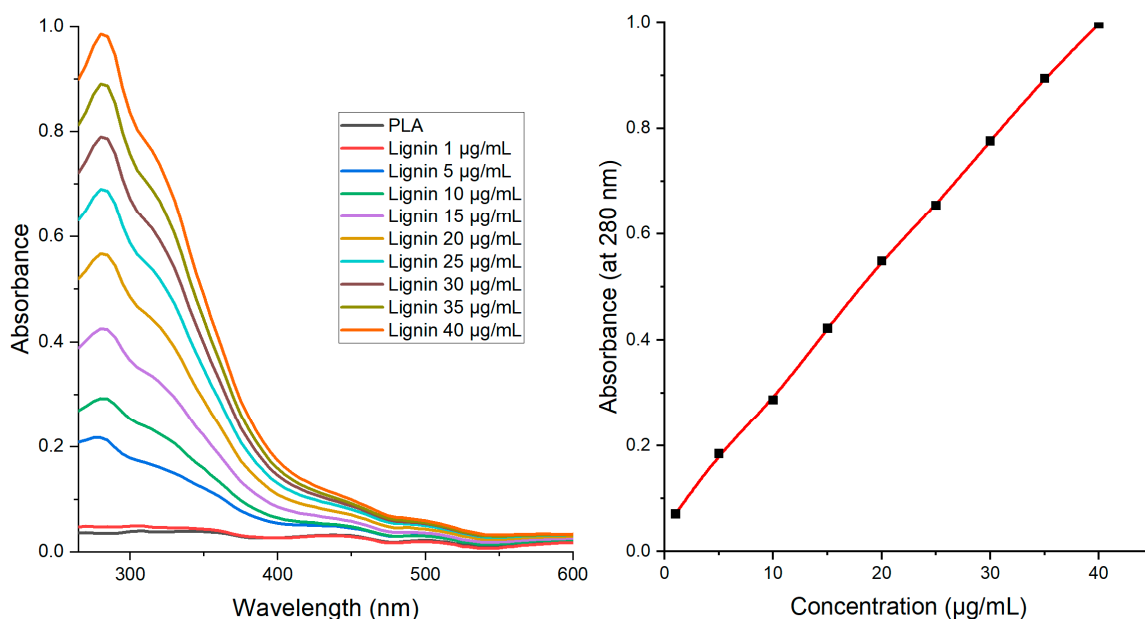

**Figure S1.** UV-Visible absorbance spectra of lignin nanoparticles in ethanol solutions at different concentrations (left) and calibration curve obtained by plotting the absorbance at 280 nm as a function of lignin concentration.

**Table S3.** Initial thermal degradation temperature (°C) and glass transition temperature (°C). The lignin content is 10 wt.%.

| Sample               | T <sub>5%</sub> | T <sub>g</sub> |
|----------------------|-----------------|----------------|
| Lignin               | -               | 164            |
| Lignin nanoparticles | -               | 165            |
| PLA                  | 378.7           | 64.2           |
| Lignin-PLA           | 374.8           | 62.7           |
| LNPs-PLA             | 368.0           | 63.2           |
| LNPs-PLA/PLA         | 379.3           | 62.7           |

T<sub>5%</sub>: Temperature at which the mass loss of the sample is 5% less than its mass loss at 50 °C via TGA;  
T<sub>g</sub>: glass transition temperature determined by DSC.

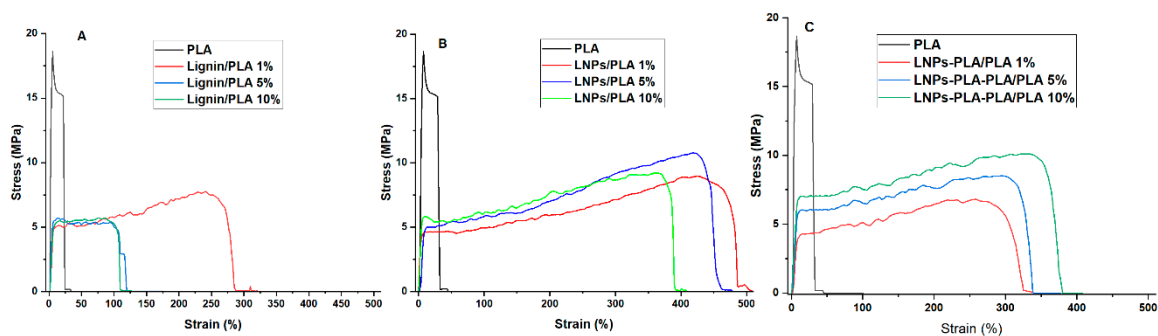

**Figure S2.** Stress-strain plots for neat PLA and PLA blend films containing different concentrations of lignin (A); lignin nanoparticles (B), and PLA-grafted lignin nanoparticles (C).

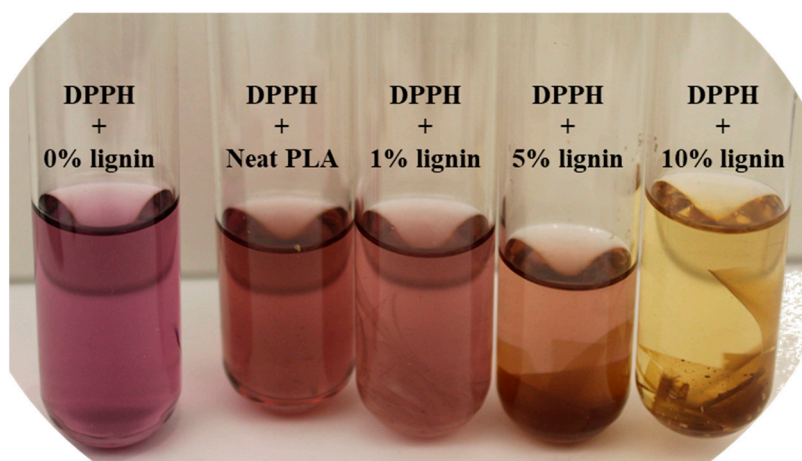

**Figure S3.** Image of DPPH solution and PLA composite films containing lignin at different concentrations (0-10%) immersed in DPPH solution (25% in methanol) for 4 h. The films are cut into small pieces before placing them into a DPPH solution.

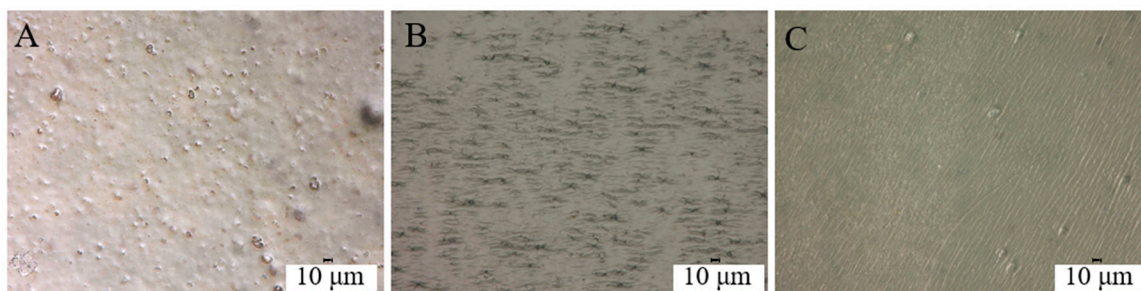

**Figure S4.** Digital images (thick films) of: (A) lignin-PLA blend, (B) lignin nanoparticle- PLA blend and (C) PLA-PLA-grafted lignin nanoparticle blend. All the blends contain 10 wt.% of lignin.
